# Supplementary material for: FOXA2 rewires AP-1 for transcriptional reprogramming and lineage plasticity in prostate cancer
Source: PubMed Central journal article supplement (PMC11162502; doi:10.1038/s41467-024-49234-9), 2024-06-08
Supplement: 41467_2024_49234_MOESM1_ESM.pdf [file 41467_2024_49234_MOESM1_ESM.pdf]

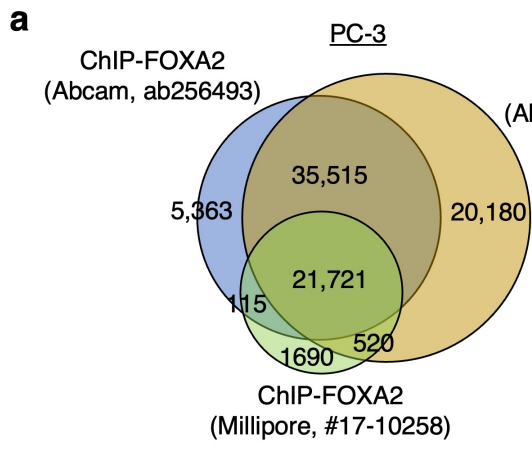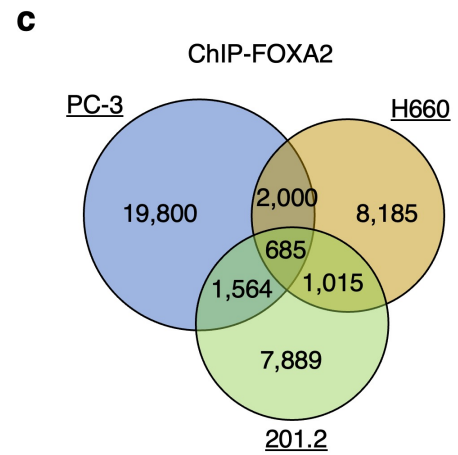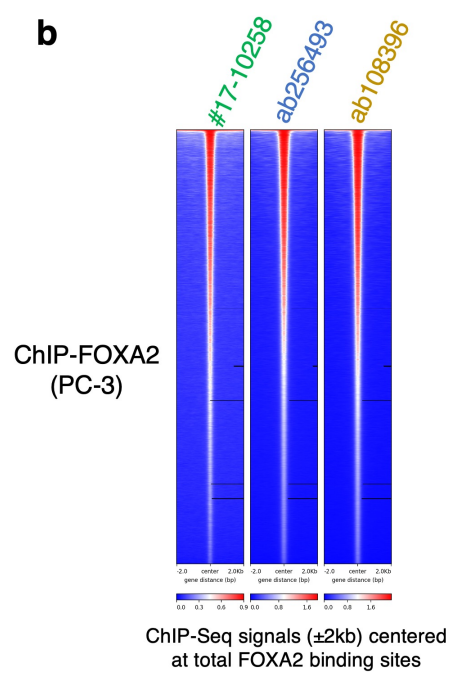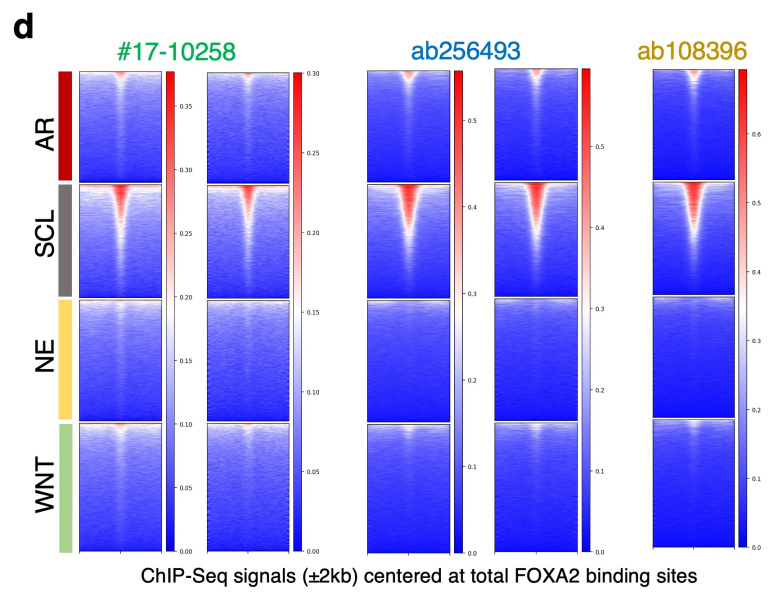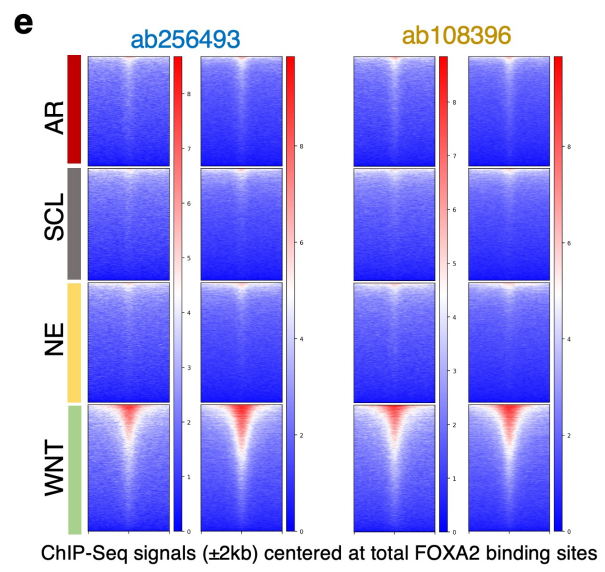

### **Supplementary Fig. 1| FOXA2 cistrome in PCa models**

**a**, ChIP-seq analyses of FOXA2 were conducted in PC-3 cells with indicated commercially available ChIP-grade antibodies. The Venn diagram shows the overlap of binding sites. **b**, Heatmap view for the FOXA2 binding intensity at all those sites, indicating consistent chromatin binding profiles from all three antibodies. **c**, The Venn diagram view for FOXA2 ChIP-seq peaks in PC-3, NCI-H660, and 201.2 models. **d**, **e**, Heatmap view for the FOXA2 binding intensity at lineage-specific ATAC-signature sites [1](#) using three different antibodies with additional replicates for PC-3 cells (d) and two different antibodies for 201.2 tumor samples (e).

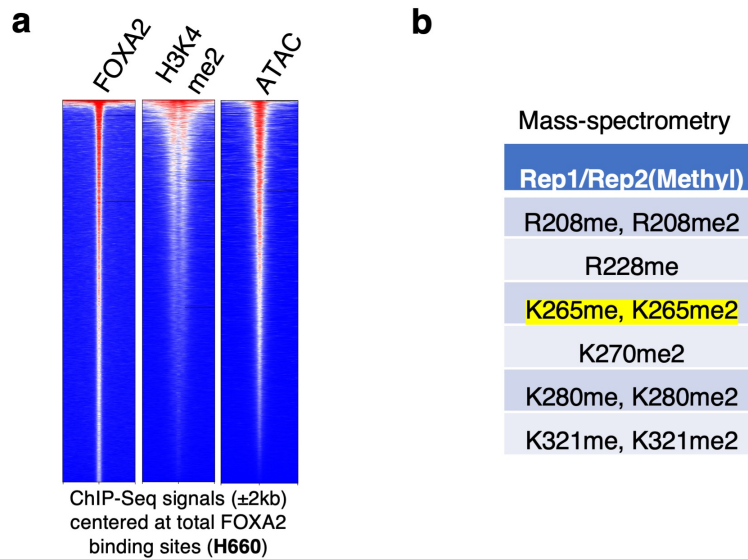

**Supplementary Fig. 2| FOXA2 binds to enhancers marked by high levels of H3K4me2 and ATAC signal**

**a**, Heatmap view for FOXA2, H3K4me2, and ATAC (Assay for Transposase-Accessible Chromatin using sequencing) peaks in NCI-H660 cells centered at the FOXA2 sites in NCI-H660. **b**, Mass-spectrometry analysis was performed on immunoprecipitated FLAG-FOXA2 in PC3 cells stably overexpressing FLAG-tagged FOXA2. Methylation sites on various FOXA2 amino acids were consistently detected in two biological replicates (K265 methylation highlighted in yellow).



siNTC. **c**, Box plot for AR expression (upper panel) and Hallmark androgen response gene signature scores (lower panel, **d**) in PC-3/NCI-H660 cells transfected with siFOXA2 versus siNTC (n=3 independent samples; center: median; box: 25<sup>th</sup> to 75<sup>th</sup> IQR; whiskers: 1.5x IQR; outliers: individual data points; statistical significance determined by unpaired two-sided *t*-test). **d**, **e**, GSVA scores for subtype-specific transcriptional signatures (based on gene annotation nearby lineage-specific ATAC signature sites [1](#)) in PC3 cells (**d**) or NCI-H660 cells (**e**) treated with/out LSD1 inhibitor, ORY1001 (n=3 independent samples; data represented as mean ± SEM; statistical significance determined by unpaired two-sided *t*-test). **f**, Immunoblotting for LSD1 in NCI-H660 cells transfected by siNTC or siLSD1 (n=3 independent experiments). **g**, qRT-PCR for indicated genes in these cells (n=3 independent samples; data represented as mean ± SEM; statistical significance determined by unpaired two-sided *t*-test). ns ( $P > 0.05$ ), \* ( $0.01 < P < 0.05$ ), \*\* ( $0.001 < P < 0.01$ ), \*\*\* ( $P < 0.001$ ), and \*\*\*\* ( $P < 0.0001$ ) were used to indicate the levels of *P*-value. Source data are provided as a Source Data file.

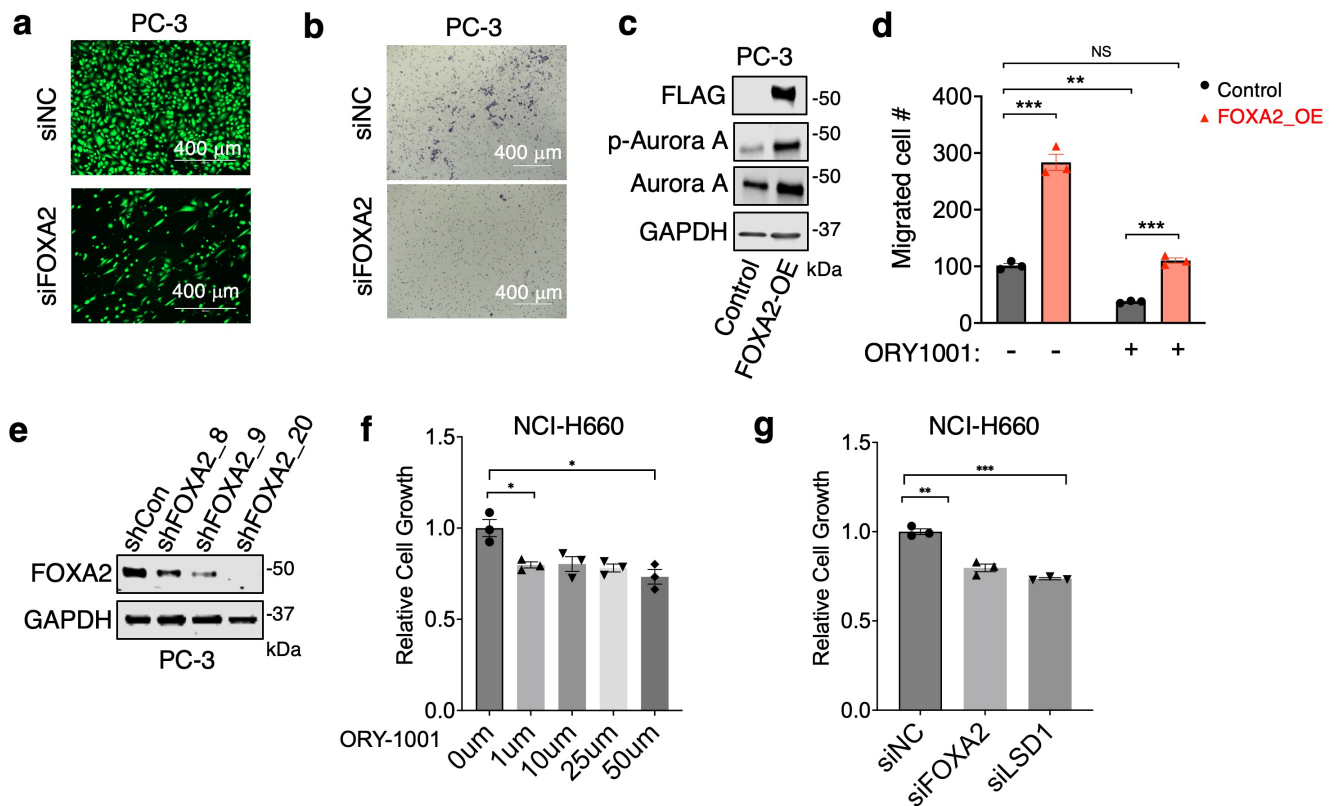

#### Supplementary Fig. 4| FOXA2 promotes CRPC tumor progression

**a, b**, Transwell migration assay (a) or Boyden chamber invasion assay (b) in PC-3 cells transfected with siFOXA2 versus siNTC. **c**, Immunoblotting for indicated proteins in PC-3 cells stably overexpressing FOXA2 (FOXA2-OE) versus control stable cells (n=3 independent experiments). **d**, Transwell migration assay in control PC-3 or PC-3-FOXA2-OE cells treated with /out ORY-1001 (10 $\mu$ M for 2d) (n=3 independent samples; data represented as mean  $\pm$  SEM; statistical significance determined by unpaired two-sided *t*-test). **e**, Immunoblotting for FOXA2 in PC-3 cells stably infected with three lentiviral shRNAs against FOXA2 versus non-target-control (NTC) (n=3 independent experiments). **f, g**, Proliferation assay for NCI-H660 cells treated with ORY-1001 (10 $\mu$ M for 3d) (f) or transfected with siFOXA2 or siLSD1 (g) (n=3 independent samples; data represented as mean  $\pm$  SEM; statistical significance determined by unpaired two-sided *t*-test). ns ( $P>0.05$ ), \* ( $0.01<P<0.05$ ), \*\* ( $0.001<P<0.01$ ), \*\*\* ( $P<0.001$ ), and \*\*\*\* ( $P<0.0001$ ) were used to indicate the levels of *P*-value. Source data are provided as a Source Data file.

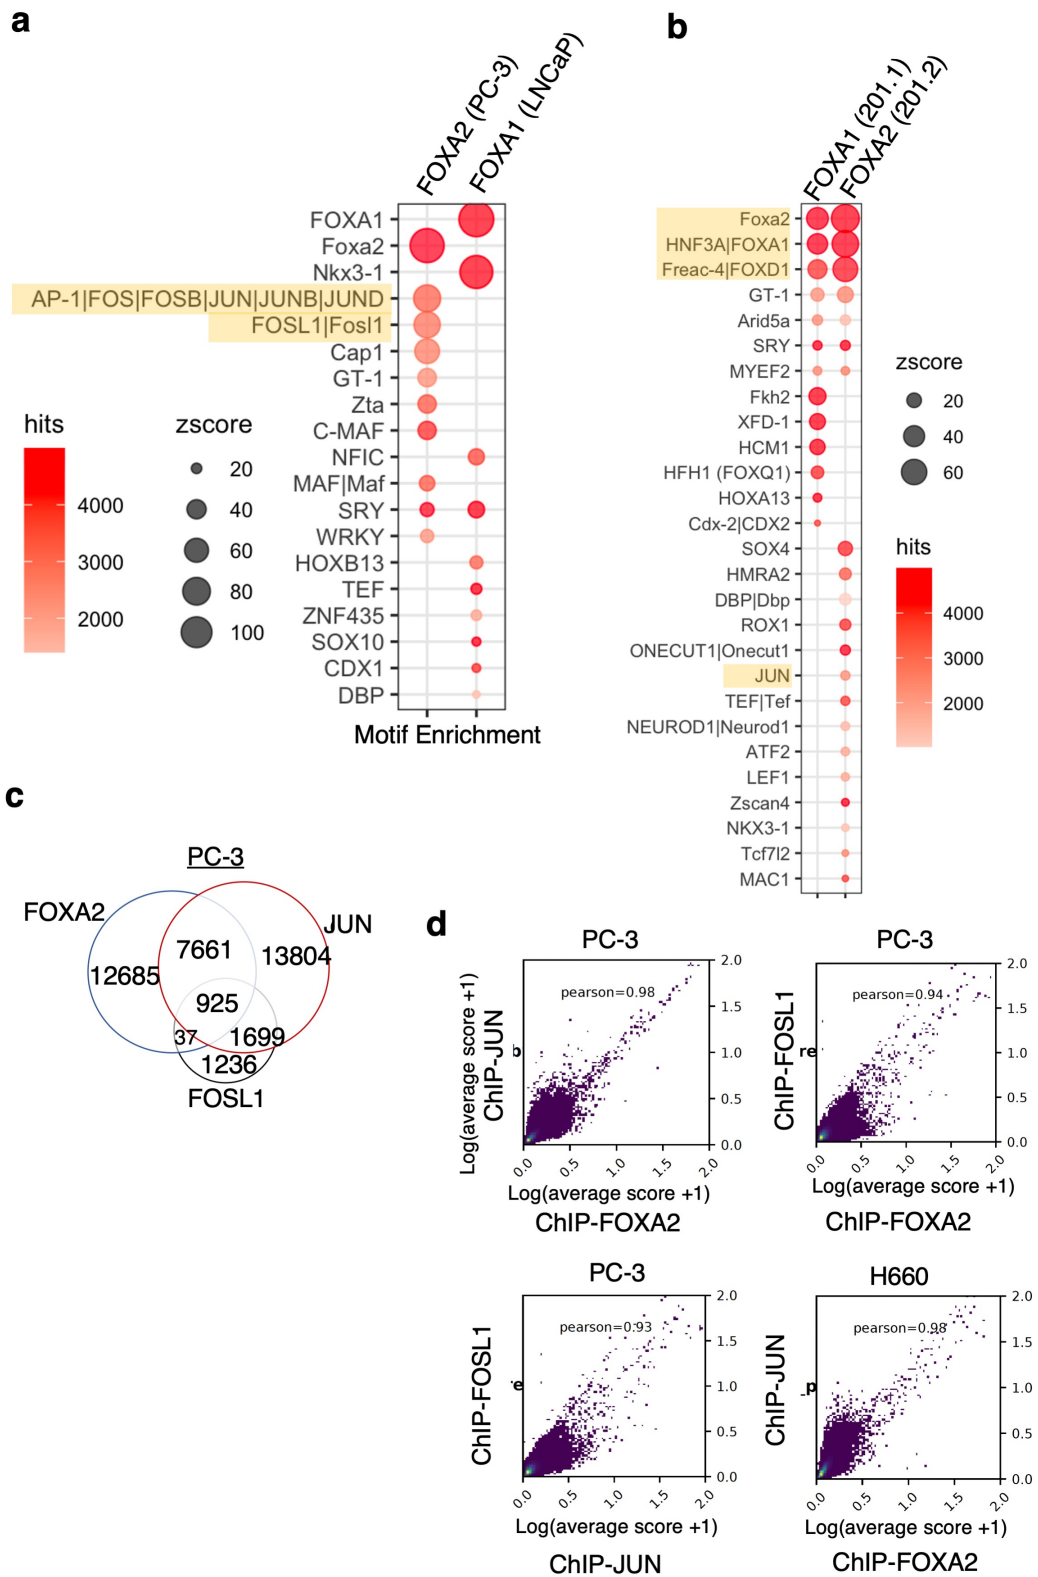

**Supplementary Fig. 5| FOXA2 and JUN chromatin binding sites are highly correlated**

**a, b**, Motifs enrichment analyses for ChIP-FOXA2 sites in PC-3 and ChIP-FOXA1 sites in LNCaP cells (a) or

201.1 and 201.2 tumor samples (b) by SeqPos motif tool. **c**, Venn diagram for FOXA2, JUN, or FOSL1 binding sites in PC-3 cells. **d**, A scatterplot for the correlation between two indicated ChIP-seq profiles based on read coverage within genomic regions using a bin size of 5kb in PC-3 and NCI-H660 cells. Pearson correlation coefficient was calculated. multiBigwigSummary and plotCorrelation tools were used for this analysis.



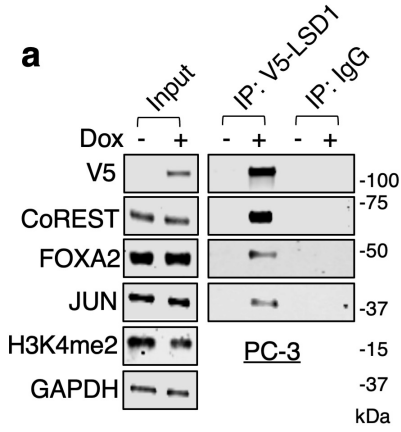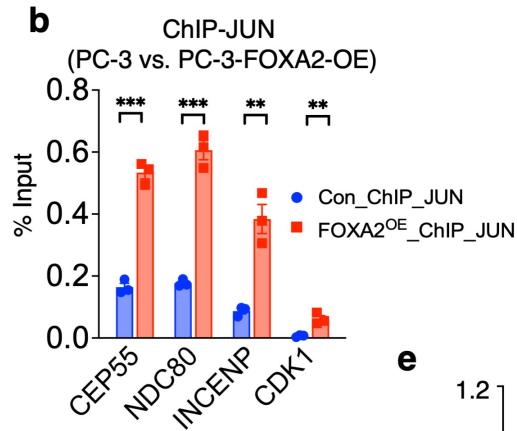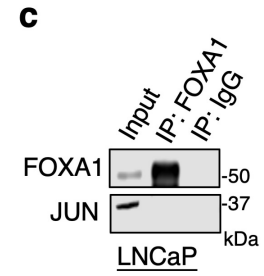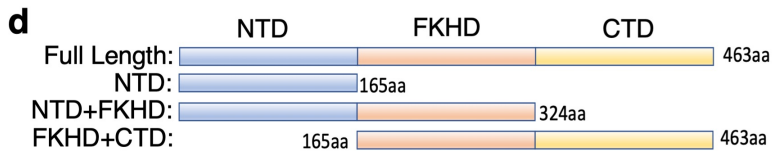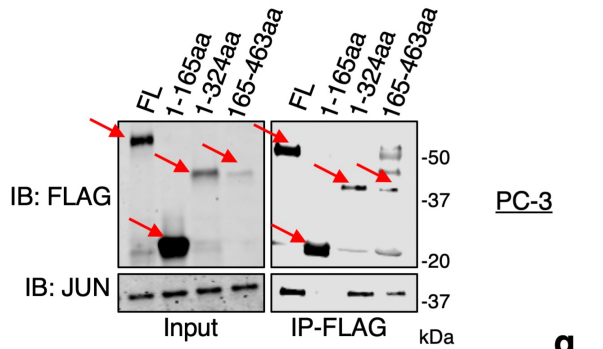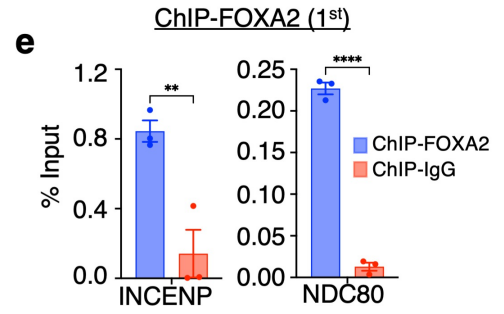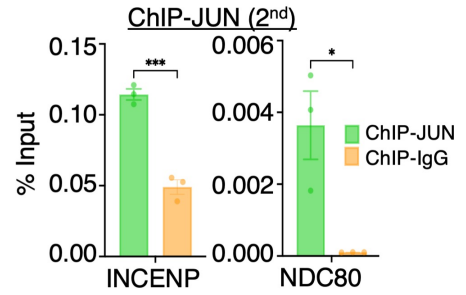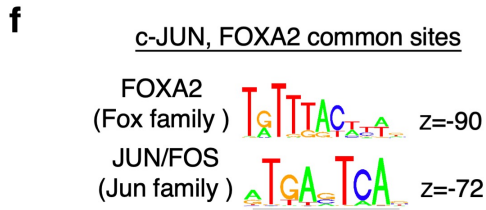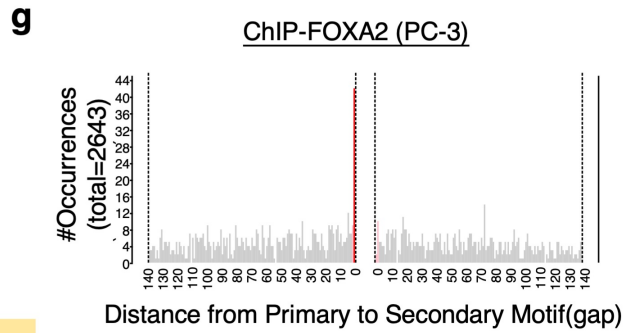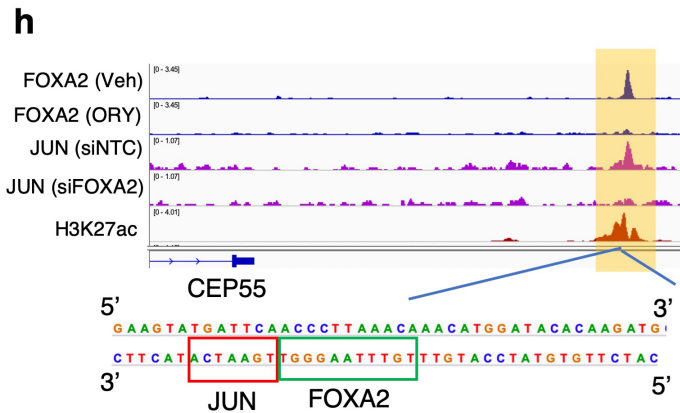

## Supplementary Fig. 6| FOXA2 interacts with JUN on chromatin

**a**, Immunoblotting for indicated proteins that were co-immunoprecipitated with V5 in PC-3 stable cells overexpressing doxycycline-inducible V5-tagged LSD1 (treated with 0.5ug/ml doxycycline to induce LSD1 overexpression, n=3 independent experiments) . **b**, CHIP-qPCR for validating the binding of JUN at the identified FOXA2 target sites in PC-3 cells stably overexpressing FOXA2 (n=3 independent samples; data represented as mean  $\pm$  SEM; statistical significance determined by unpaired two-sided *t*-test). **c**, Immunoblotting for indicated proteins that were co-immunoprecipitated with FOXA1 in LNCaP cells (n=3 independent experiments). **d**, Immunoblotting for indicated proteins that were co-immunoprecipitated with FLAG in PC-3 cells transiently expressing FLAG-tagged truncated FOXA2 proteins (n=3 independent experiments). **e**, CHIP-qPCR to validate the co-occupancy of FOXA2 and JUN on the indicated FOXA2 target sites PC-3 cells using a re-ChIP sequential approach with FOXA2 and JUN antibodies (n=3 independent samples; data represented as mean  $\pm$  SEM; statistical significance determined by unpaired two-sided *t*-test). **f-h**, Motif enrichment analysis was performed at FOXA2 and JUN co-binding sites in PC-3 cells to identify the top-ranked enriched motifs (f), followed by the analysis of the distance from the primary to the secondary motif (gap) for composition motif enrichment (g) and a genome browser view for a FOXA2/JUN co-binding site at *CEP55* gene loci (h). ns ( $P>0.05$ ), \* ( $0.01<P<0.05$ ), \*\* ( $0.001<P<0.01$ ), \*\*\* ( $P<0.001$ ), and \*\*\*\* ( $P<0.0001$ ) were used to indicate the levels of *P*-value. Source data are provided as a Source Data file.

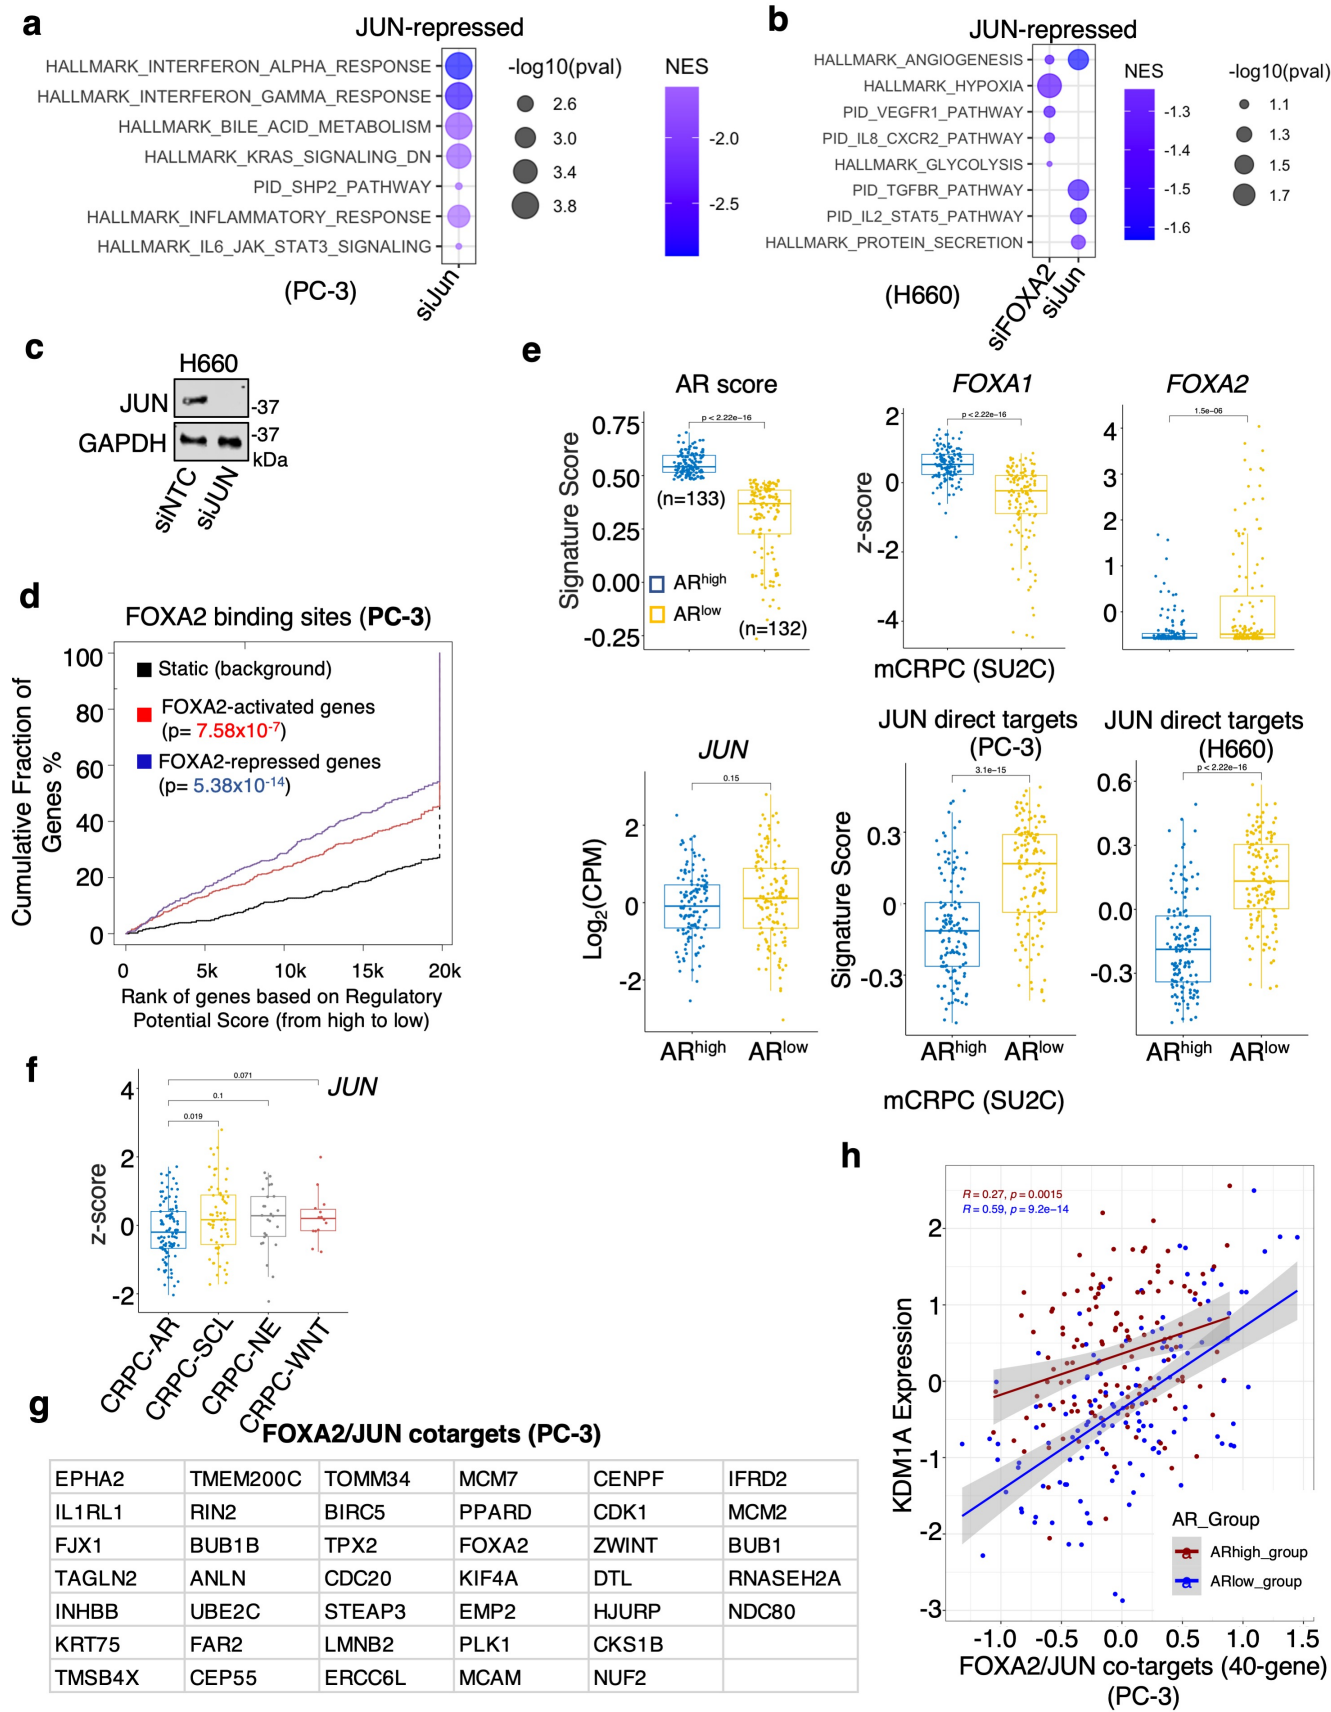

## Supplementary Fig. 7| Chromatin binding, expression, and targets of JUN in AR-low CRPC

**a, b**, GSEA using HALLMARK and PID datasets to compare siJUN versus siNTC in PC-3 cells (a) or siJUN and siFOXA2 versus siNTC in NCI-H660 cells (b). **c**, Immunoblotting for JUN in NCI-H660 cells transfected with siJUN versus siNTC (n=3 independent experiments). **d**, BETA integrating ChIP-FOXA2 binding sites and RNA-seq data from PC-3 cells transfected with siNTC versus siFOXA2. **e**, Boxplots (center: median; box: 25th to 75th IQR; whiskers: 1.5x IQR; outliers: individual data points; statistical significance determined by unpaired two-sided *t*-test) for expression scores or levels of AR score, *FOXA1*, *FOXA2*, *JUN*, and JUN-direct-targets (identified from PC-3 or NCI-H660) in AR score-high (n=133) and AR-score low (n=132) CRPC patient samples (SU2C) <sup>2</sup>. **f**, JUN mRNA expression (z-score) in four different CRPC subtypes (CRPC-AR n=104 genes, CRPC-SCL n=62 genes, CRPC-NE n=26, and CRPC-WNT n=14) <sup>1</sup> using the SU2C dataset (center: median; box: 25th to 75th IQR; whiskers: 1.5x IQR; outliers: individual data points; statistical significance determined by unpaired two-sided *t*-test). **g, h**, FOXA2/JUN directly regulated co-targets (identified from PC3 cells, g) were correlated with *LSD1* (*KDM1A*) expression in AR score-high versus AR core-low CRPC-AR low CRPC samples (h).

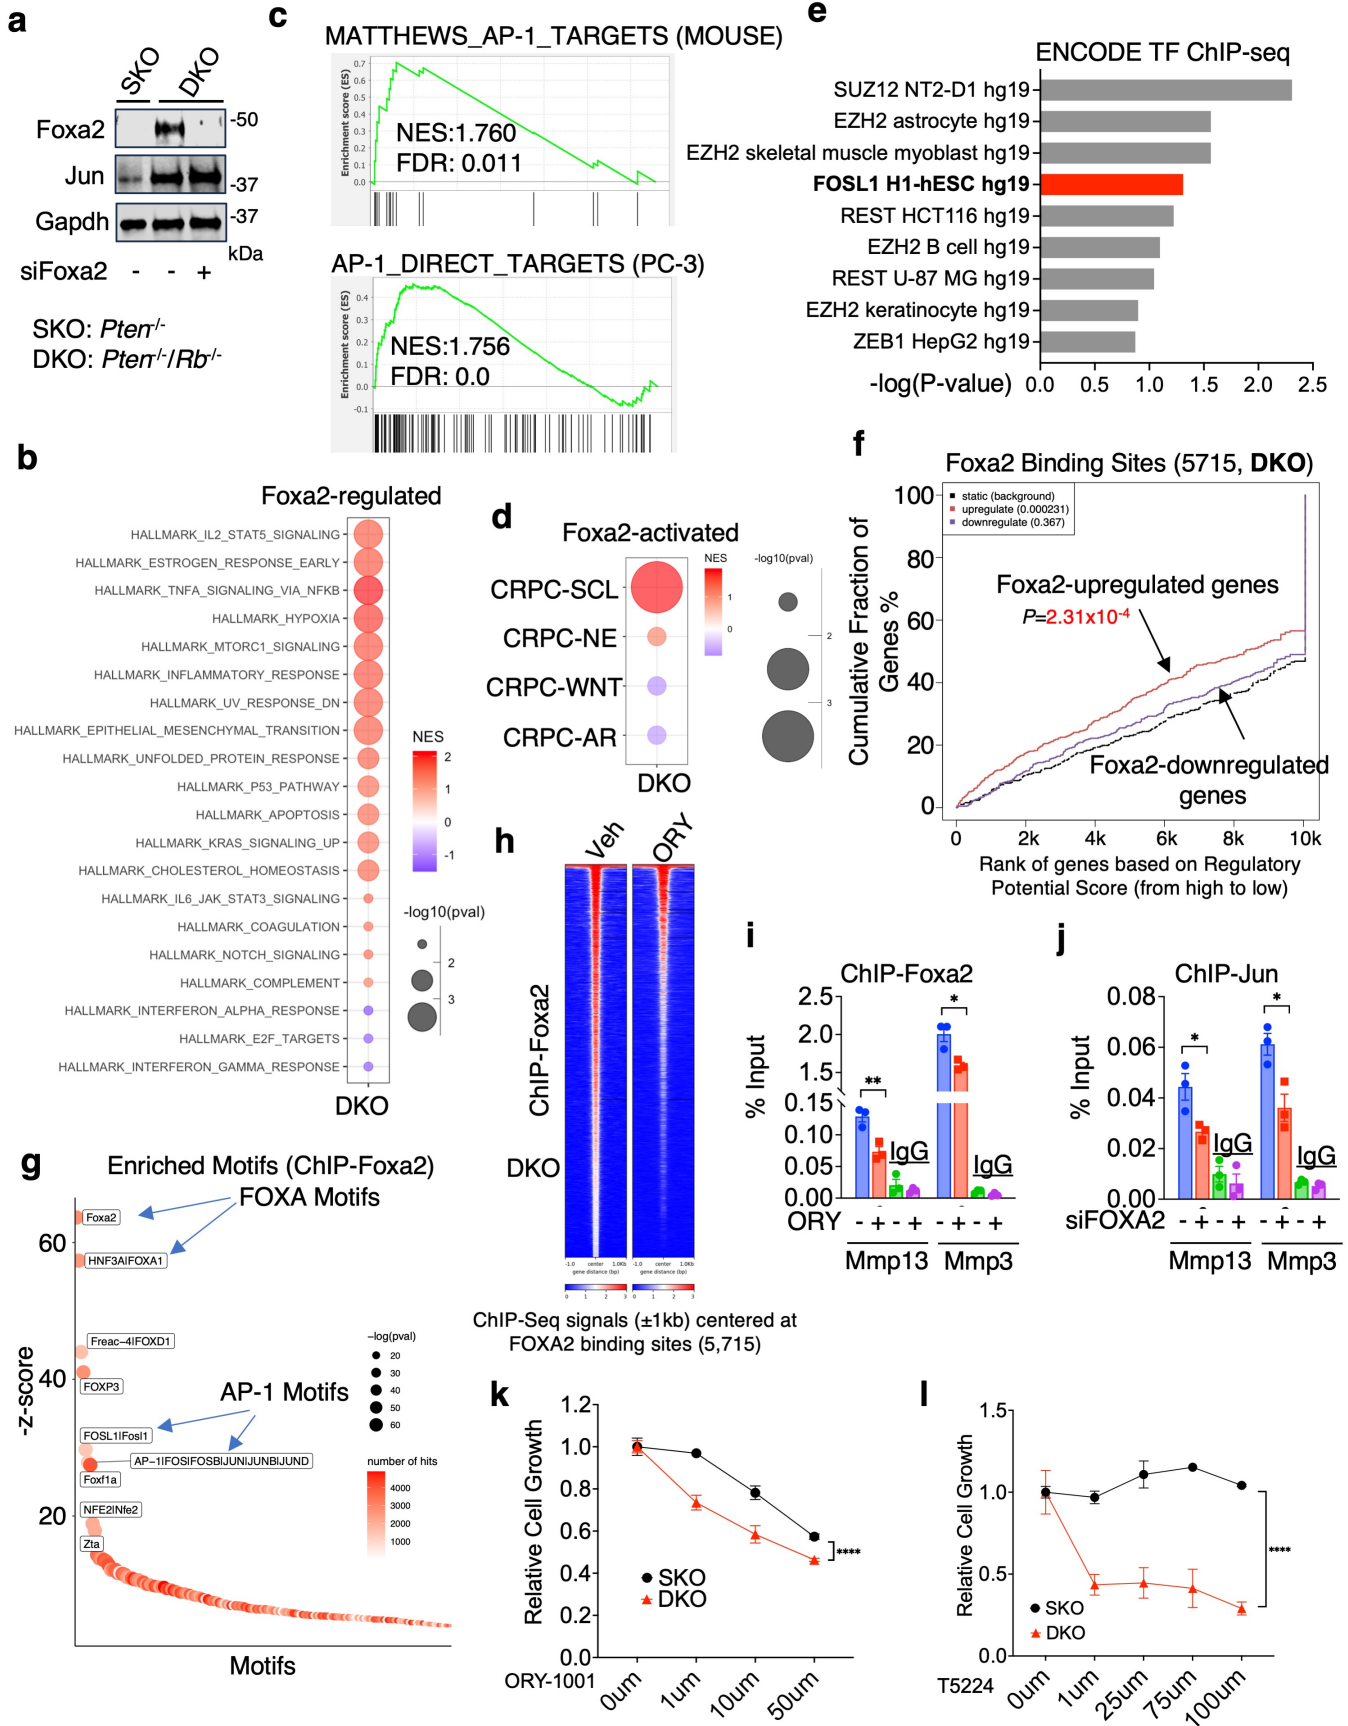

## Supplementary Fig. 8| FOXA2 transcription activity in DKO murine PCa cell line

**a**, Immunoblotting for Foxa2 and Jun in SKO (*Pten*<sup>-/-</sup>) and DKO (*Pten*<sup>-/-</sup>/*Rb*<sup>-/-</sup>) murine PCa cells transfected with siFoxa2 versus siNTC (n=3 independent experiments). **b**, GSEA using HALLMARK and PID datasets to identify Foxa2 upregulated (siFoxa2-downregulated, red) and downregulated genes (siFoxa2-upregulated, blue). **c**, GSEA for the enrichment of Foxa2 regulated genes using MATTHEWS\_AP-1\_TARGETS (identified from mouse models) and our AP-1 direct targets (identified from PC-3 model) gene sets. **d**, GSEA for Foxa2-activated genes using lineage-specific signature gene sets. **e**, Prediction of potential transcription factor (TF) regulation for Foxa2-activated genes based on their nearby TF binding peaks using ENCODE TF ChIP-seq database. **f**, ChIP-seq of Foxa2 in DKO cells identified 5,715 peaks (using the antibody ab256493 from Abcam). BETA integrating ChIP-Foxa2 binding sites and RNA-seq data from DKO cells transfected with siNTC versus siFoxa2. **g**, Motif enrichment analysis of Foxa2 binding sites. **h**, ChIP-seq of Foxa2 in DKO cells treated with LSD1 inhibitor (ORY-1001, 10 $\mu$ M, 4h). Heatmap view for the change of Foxa2 binding intensity at 5,715 Foxa2 binding sites. **i**, ChIP-qPCR for Foxa2 binding at two Foxa2 binding sites located at *Mmp3* and *Mmp13* genes in DKO cells treated with/out ORY-1001 (10 $\mu$ M, 4h) (n=3 independent samples; data represented as mean  $\pm$  SEM; statistical significance determined by unpaired two-sided *t*-test). **j** ChIP-qPCR for Jun binding at these two sites in DKO cells transfected with siNTC or siFoxa2 (n=3 independent samples; data represented as mean  $\pm$  SEM; statistical significance determined by unpaired two-sided *t*-test). **k, l**, Viability assay for SKO and DKO cells treated with 0-50 $\mu$ M ORY-1001 (**k**) or 0-100 $\mu$ M T5224 (**l**) for 3d (n=3 independent samples; data represented as mean  $\pm$  SEM; statistical significance determined by two-way ANOVA). Note: SKO (*Pten*<sup>-/-</sup>) murine PCa cell line and DKO (*Pten*<sup>-/-</sup>/*Rb*<sup>-/-</sup>) murine PCa cells were cultured in DMEM supplemented with 10% FBS. ns ( $P>0.05$ ), \* ( $0.01<P<0.05$ ), \*\* ( $0.001<P<0.01$ ), \*\*\* ( $P<0.001$ ), and \*\*\*\* ( $P<0.0001$ ) were used to indicate the levels of *P*-value. Source data are provided as a Source Data file.

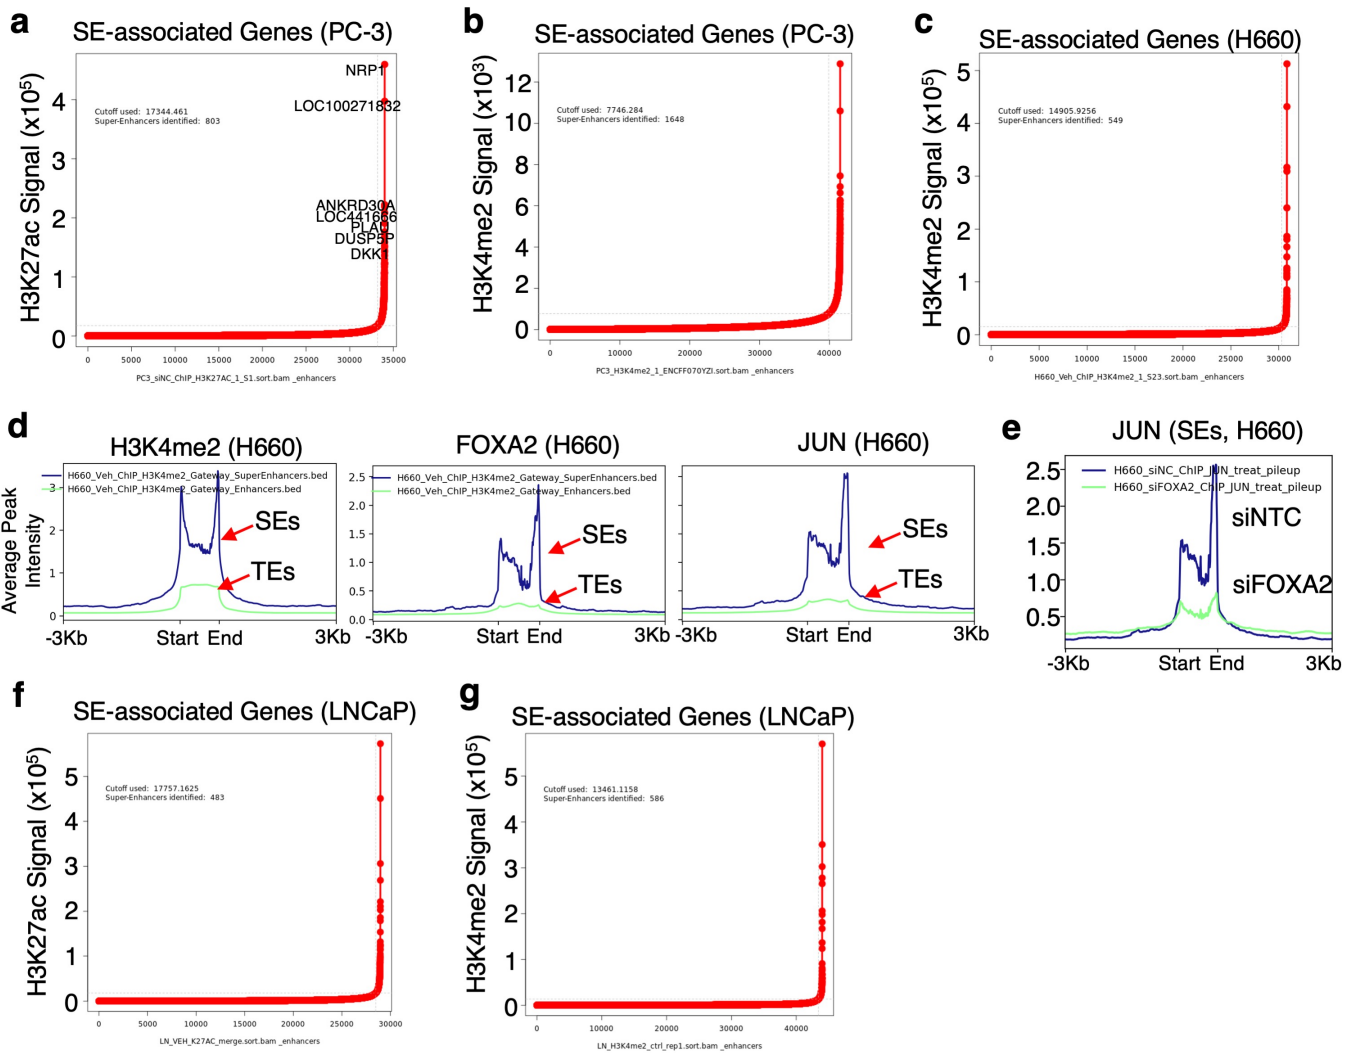

### Supplementary Fig. 9| Identification of super-enhancers in different PCa cell lines

**a-c**, Model-specific super-enhancers (SEs) were identified using the ROSE algorithm based on ChIP-seq data for H3K27ac (a) and H3K4me2 (b) in PC3 cells, or H3K4me2 in NCI-H660 cells (c). **d**, Average binding intensity of indicated proteins at super-enhancers (SEs) versus typical enhancers (TEs) in NCI-H660 cells. **e**, Average JUN binding intensity at SEs in NCI-H660 cells transfected with siFOXA2 versus siNTC. **f, g**, Super-enhancers were identified using the ROSE algorithm based on ChIP-seq data for H3K27ac (f) and H3K4me2 (g) in LNCaP cells (GSE114268 [3](#)).

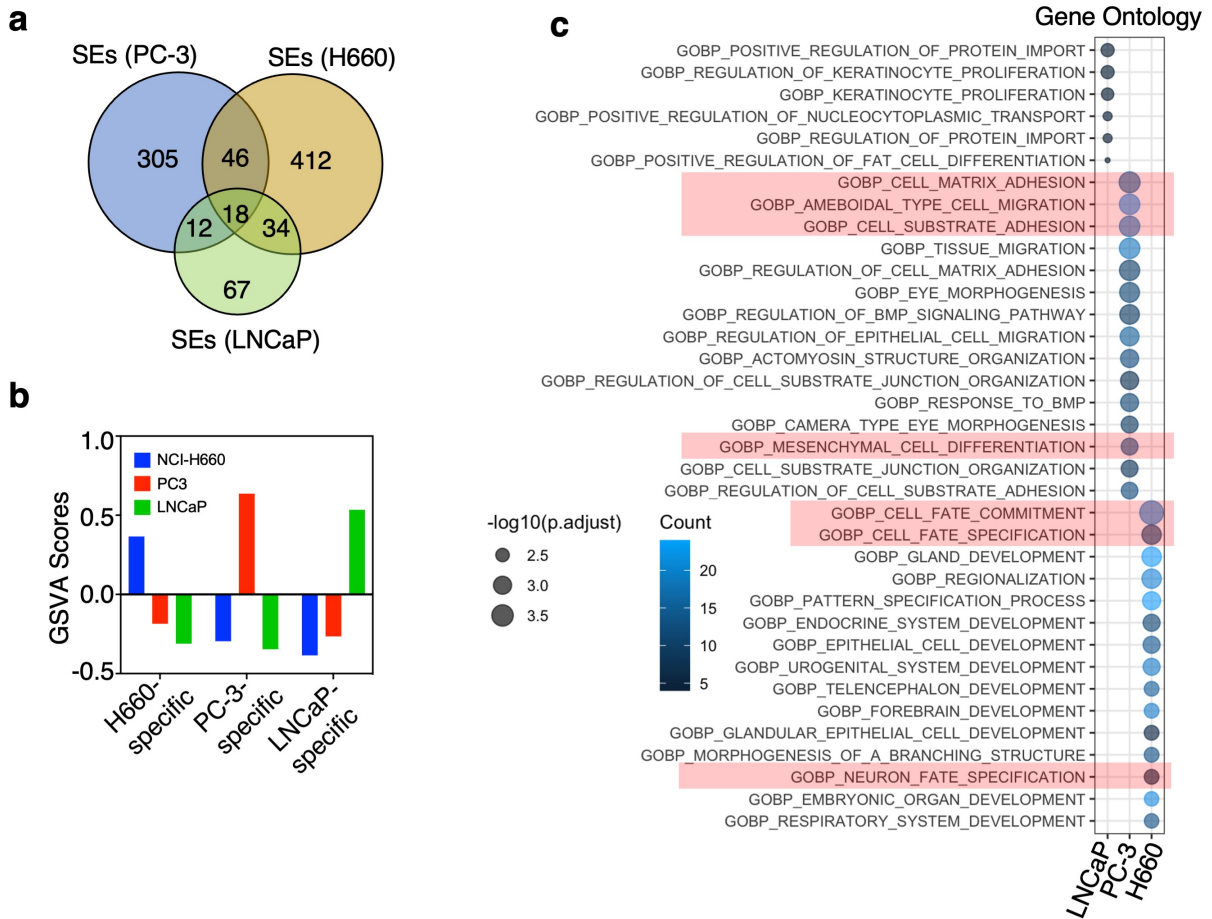

**Supplementary Fig. 10| Super-enhancer-associated genes are functionally distinct in CRPC subtypes**

**a**, Venn diagram for super-enhancer (SE)-associated genes in LNCaP, PC3, and H660 cells. **b**, Gene set variation analysis (GSVA) scores of the specific SE-associated genes in LNCaP, PC3, and H660 cells. **c**, Gene ontology annotation analysis to examine the functional enrichment of SE-associated genes identified in LNCaP, PC3, and H660 cells.



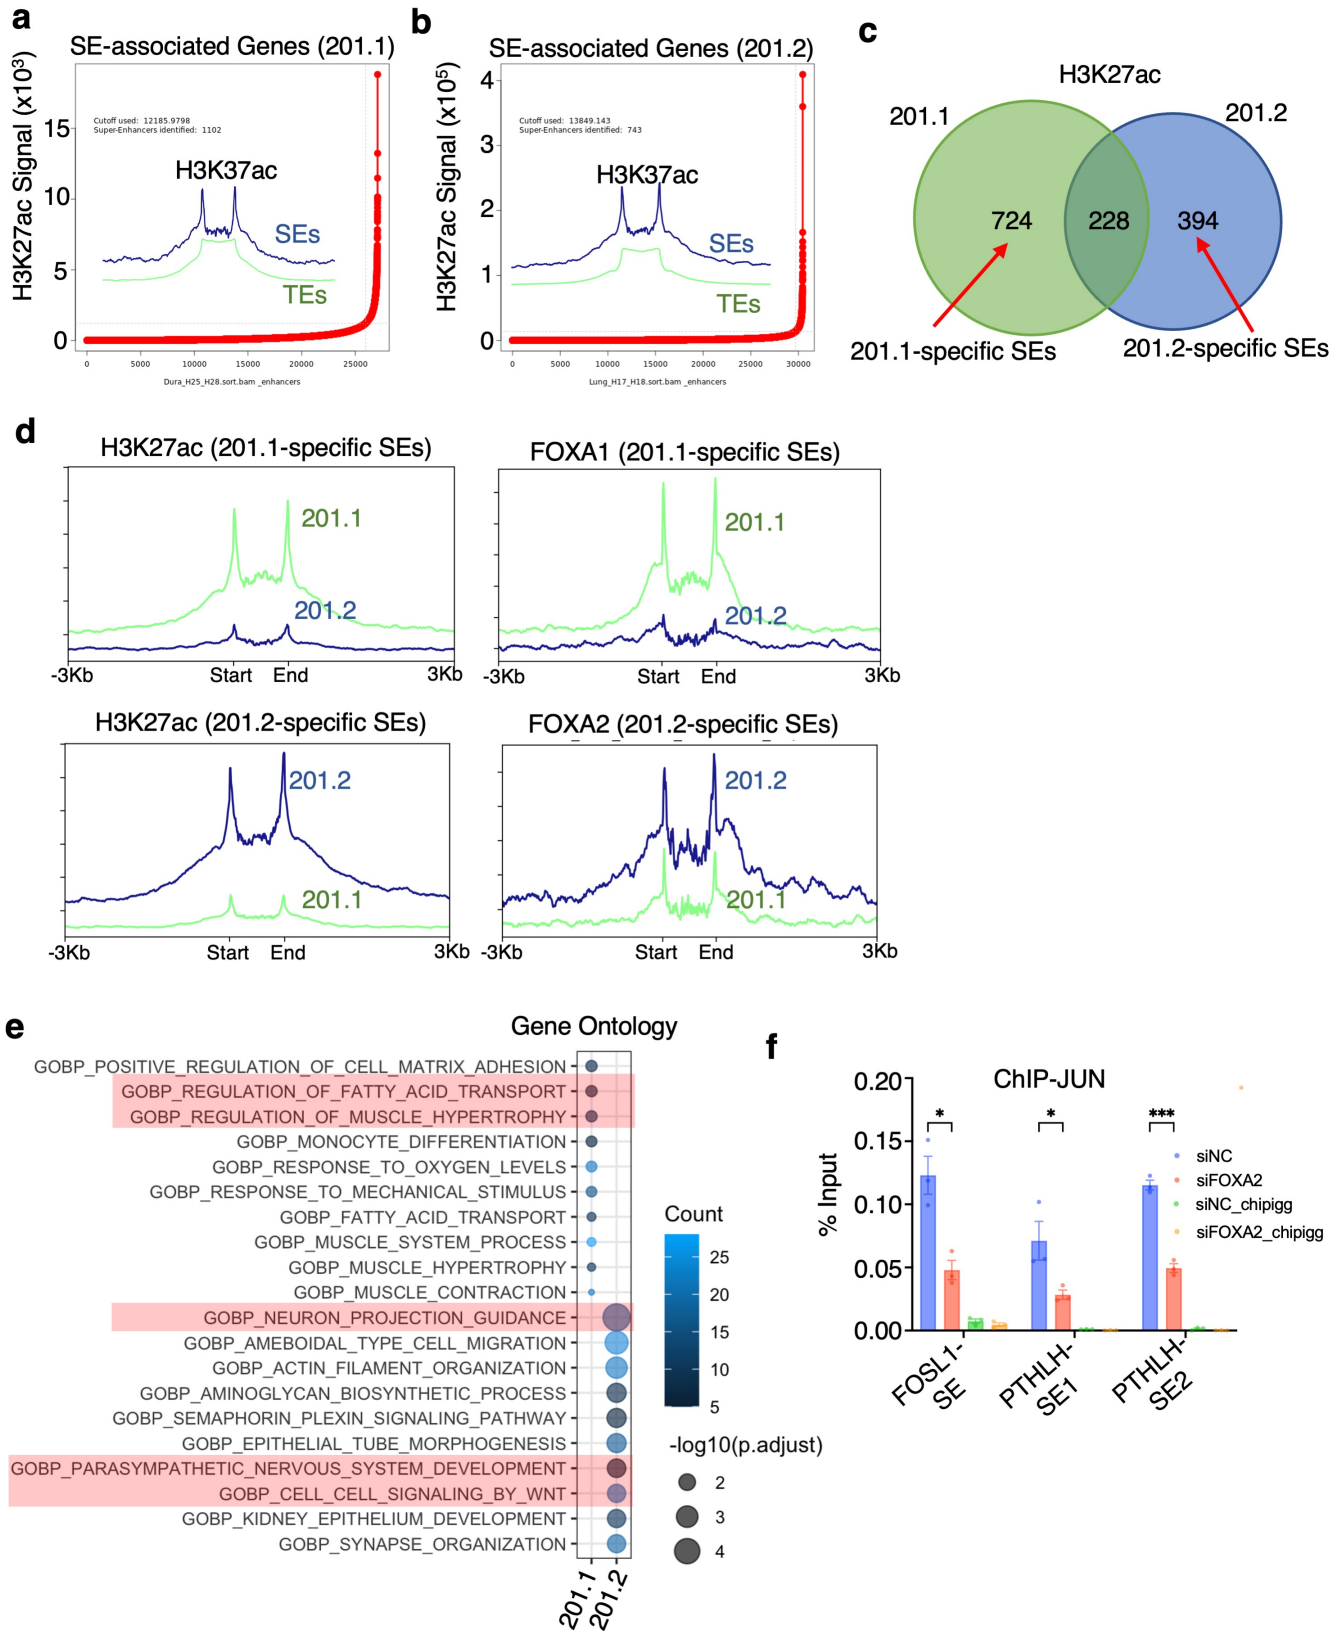

**Supplementary Fig. 11| Identification of super-enhancers in PDX models**

**a, b**, Model-specific super-enhancers (SEs) were identified using the ROSE algorithm based on ChIP-seq data

for H3K27ac in 201.1 (a) and 201.2 (b) models. **c**, Venn diagram for the overlap of SEs identified in 201.1 and 201.2 models. **d**, Average binding intensities of indicated proteins at 201.1-specific SEs and 201.2-specific SEs in 201.1 and 201.2 models. **e**, Gene ontology annotation analysis to examine the functional enrichment of differential SE-associated genes identified in 201.1 and 201.2 models. **f**, CHIP-qPCR for JUN binding at three SE sites in PC-3 cells transfected with siNTC or siFOXA2 (n=3 independent samples; data represented as mean  $\pm$  SEM; statistical significance determined by unpaired two-sided *t*-test). ns ( $P>0.05$ ), \* ( $0.01<P<0.05$ ), \*\* ( $0.001<P<0.01$ ), \*\*\* ( $P<0.001$ ), and \*\*\*\* ( $P<0.0001$ ) were used to indicate the levels of *P*-value. Source data are provided as a Source Data file.

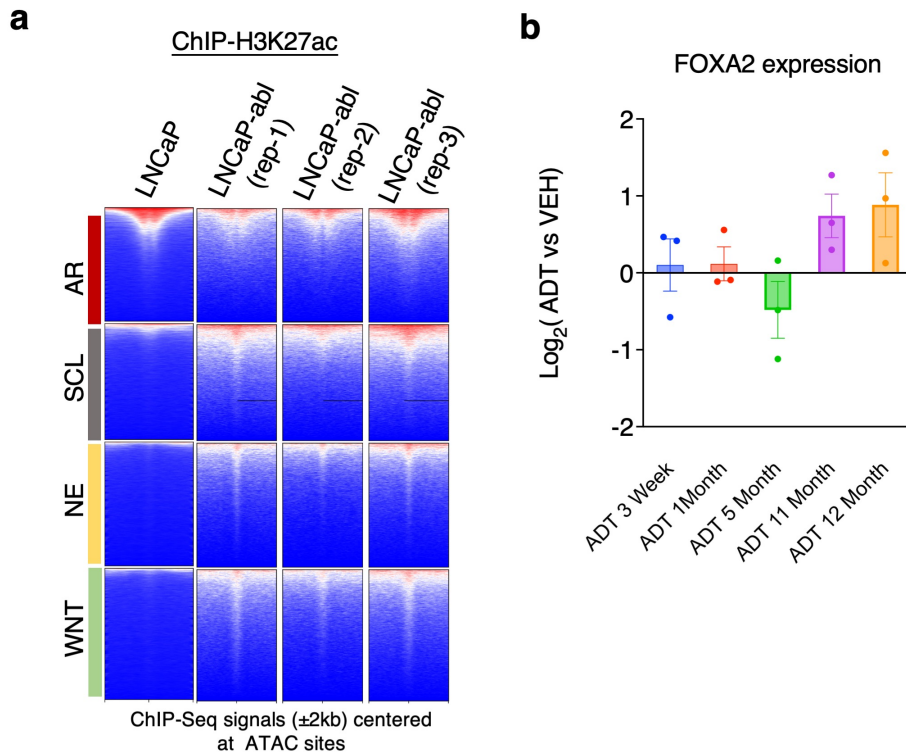

**Supplementary Fig. 12| AR targeting treatments drive tumor cells into a multilineage transition state**

**a**, Heatmap view for H3K27ac signal levels at four lineage-specific signature sites in LNCaP and LNCaP-abl cells (continuously cultured in hormone-depleted medium) using public ChIP-seq dataset (GSE114268 [3](#), GSE72467 [4](#)). **b**, FOXA2 expression in LNCaP cells cultured in hormone-depleted medium for indicated time points using public dataset (GSE8702 [5](#)) (Box plot - center: median; box: 25th to 75th IQR; whiskers: 1.5x IQR; outliers: individual data points, n=3 independent samples).

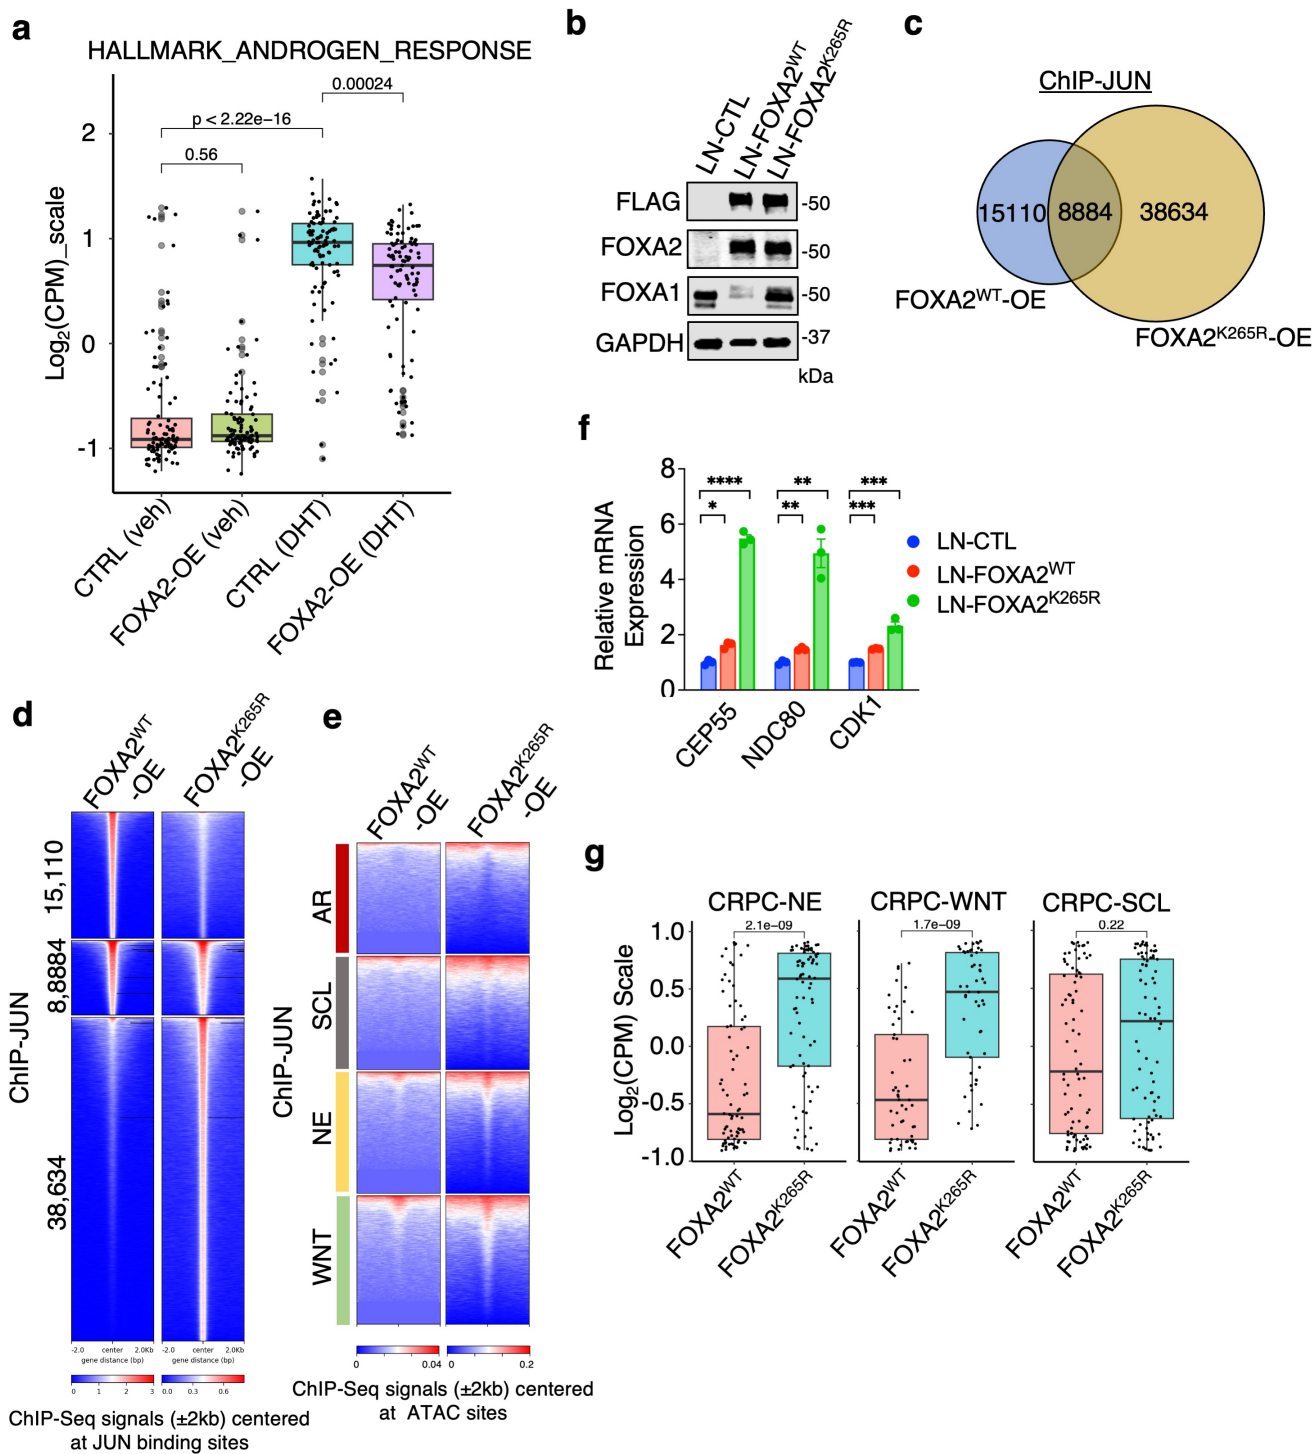

**Supplementary Fig. 13| K265R mutation of FOXA2 enhances JUN chromatin binding and maintains the multilineage state of tumor cells**

a, Boxplots (center: median; box: 25th to 75th IQR; whiskers: 1.5x IQR; outliers: individual data points; statistical significance determined by unpaired two-sided *t*-test) for expression levels of HALLMARK\_ANDROGEN-

**a**, **\_RESPONSE** gene set (n=100 genes) in control LNCaP cells or LN-FOXA2-OE cells treated with vehicle or 10nM DHT for 24 hours (based on RNA-seq data). **b**, Immunoblotting for indicated proteins in LNCaP cells overexpressing FLAG-tagged WT FOXA2 or K265R mutant (n=3 independent experiments). **c**, **d**, Venn diagram (c) or heatmap view (d) for JUN ChIP-seq peaks in the WT and K265R cell lines. **e**, Heatmap view for the ChIP-seq signal of JUN centered at specific chromatin sites exhibiting different ATAC signatures for CRPC subtypes **1**. **f**, qRT-PCR for indicated FOXA2/JUN targets in the WT and K265R cell lines (n=3 independent samples; data represented as mean  $\pm$  SEM; statistical significance determined by unpaired two-sided *t*-test). **g**, Box plots (center: median; box: 25th to 75th IQR; whiskers: 1.5x IQR; outliers: individual data points; statistical significance determined by unpaired two-sided *t*-test) for three non-AR subtype-specific transcriptional signatures (n=93 genes for each subtype **1**) in the WT-expressing cells versus K265R mutant-expressing cells. ns ( $P>0.05$ ), \* ( $0.01<P<0.05$ ), \*\* ( $0.001<P<0.01$ ), \*\*\* ( $P<0.001$ ), and \*\*\*\* ( $P<0.0001$ ) were used to indicate the levels of *P*-value. Source data are provided as a Source Data file.

## OTHER SUPPLEMENTARY INFORMATION

### ChIP-qPCR Primers:

| Targets         | Sequence (5'->3')         |
|-----------------|---------------------------|
| INCENP-F        | TGTTGGCTAGAAGGCAAAGGAA    |
| INCENP-R        | CCAGTTTTTCATCTGCTTTGGGT   |
| CEP55-F         | GAGAGCTGCCTGGCTTTTTTA     |
| CEP55-R         | TGGCATCTTGTGTATCCATGTTTTG |
| ERCC6L-F        | CACACACCAGCCTGAGAGAAT     |
| ERCC6L-R        | GCTGGGTCTTAGGGAATGTGT     |
| CCBE1_F         | AGCTGTTTACTTTTTTCATCCCGC  |
| CCBE1_R         | GGACCGGAGCTCCTTTTGTG      |
| CDK1_62561458-F | AAAACAGCCTTCCAGGGAGTG     |
| CDK1_62561458-R | ATCCAAGTCAAAGGTAGCTGGA    |
| NDC80-F         | GCCATGAGTCACAGAAGGTTG     |
| NDC80-R         | TCAGTGATAACCATAACAACTGG   |
| TP63_F          | ACTCATCTGTTTACCTTTTGCTGT  |
| TP63_R          | TGTGGTTCTGAGGCTGAGTG      |
| WNT7A_F         | GCGTCAGTGAATGGTTGCTG      |
| WNT7A_R         | AAACTGGTTCCTGCCATCAG      |
| PTHLH_F_SE1     | TGAGAGTTCAATGTTGCGAGTG    |
| PTHLH_R_SE1     | TGATTTAACGTCAGGTGTGTGGT   |
| PTHLH_F_SE2     | GGGTAGGGGAGGTGCATTTT      |
| PTHLH_R_SE2     | TGTGTTGAGCCAGATACTATGTCA  |
| FOSL1_F_SE      | CAGGAGTGGGATGAAACGCC      |
| FOSL1_R_SE      | TGGGTGGGGTGGTTTATTGG      |
| Mmp3_F          | TTATTGACAGTGCAGACGGTCC    |
| Mmp3_R          | CTAGCCCAAGGCTTTTCAGGA     |
| Mmp13_F         | CCTTCGCCTCACTAGGAAGTT     |
| Mmp13_R         | CCCAGGGCAAGCATCTTCTAT     |

### Mutagenesis Primers:

|                          |                                  |
|--------------------------|----------------------------------|
| <b>FOXA2_K265R</b>       |                                  |
| HmanFOXA2_K265R_Forward  | CGCTTCAAGTGCGAGCGGCAGCTGGCGCTGAA |
| HumanFOXA2_K265R_Reverse | TTCAGCGCCAGCTGCCGCTCGCACTTGAAGCG |
| <b>FOXA2(1-165aa)</b>    |                                  |
| FOXA2_1-165aa_Forward    | TAGAAGAGCCCGGGCGATCGCGAA         |

|                         |                           |
|-------------------------|---------------------------|
| FOXA2_1-165aa_Reverse   | CTTTGCGTGCGTGTAGCTGCGCCT  |
| <b>FOXA2(1-324aa)</b>   |                           |
| FOXA2_324aa_Forward     | TAGAAGAGCCCCGGGCGATCGCGAA |
| FOXA2_324aa_Reverse     | GCCCCCTCGCTTGTGCTCCTGG    |
| <b>FOXA2(165-463aa)</b> |                           |
| FOXA2_166-463aa_Forward | CCGCCCTACTCGTACATCTCGCTC  |
| FOXA2_166-463aa_Reverse | CATGGTACCGAATTCCTTCAAGCCT |

**Designed siRNA Sequence:**

|        |                        |
|--------|------------------------|
| siLSD1 | GACAAGCUGUCCUAAAGAGAAA |
|--------|------------------------|

**Unprocessed Gel Blots:** The unprocessed immunoblotting gel blots for Supplementary Figures are provided in the Source Data file.

**SUPPLEMENTARY REFERENCES**

1. Tang F, *et al.* Chromatin profiles classify castration-resistant prostate cancers suggesting therapeutic targets. *Science* **376**, eabe1505 (2022).
2. Abida W, *et al.* Genomic correlates of clinical outcome in advanced prostate cancer. *Proc Natl Acad Sci U S A* **116**, 11428-11436 (2019).
3. Gao S, *et al.* Chromatin binding of FOXA1 is promoted by LSD1-mediated demethylation in prostate cancer. *Nat Genet* **52**, 1011-1017 (2020).
4. Wang S, *et al.* Modeling cis-regulation with a compendium of genome-wide histone H3K27ac profiles. *Genome Res* **26**, 1417-1429 (2016).
5. D'Antonio JM, Ma C, Monzon FA, Pflug BR. Longitudinal analysis of androgen deprivation of prostate cancer cells identifies pathways to androgen independence. *Prostate* **68**, 698-714 (2008).
